# Supplementary material
Source: PubMed Central journal article supplement (PMC3725800)
Supplement: Supp_Fig4.pdf [file Supp_Fig4.pdf]

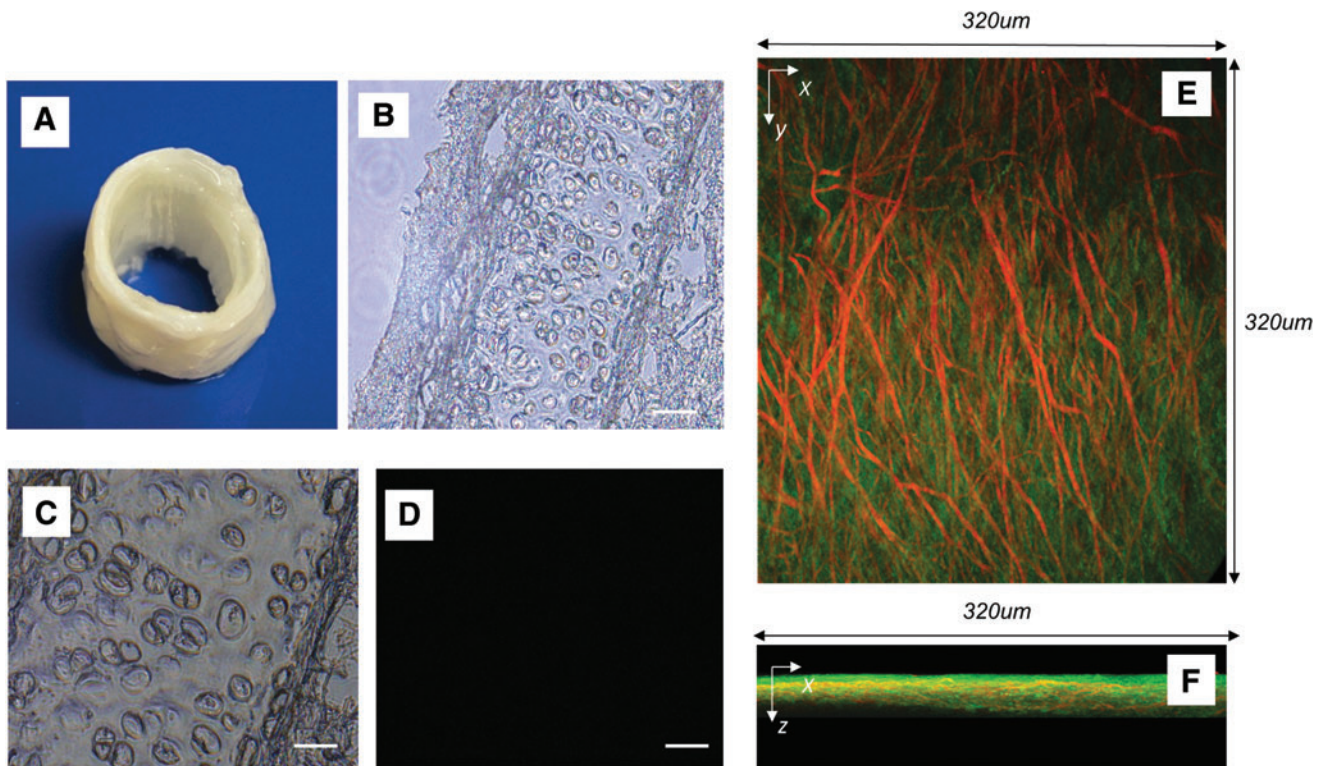

**SUPPLEMENTARY FIG. S4.** Evaluation of AC human main stem bronchus. (A) Gross image of 1" section of AC human main stem bronchus. (B, C) Phase contrast images of AC bronchus showing that there are no cells or nuclei left in the lacunae. (B) Scale bar=20 μm. (C) Scale bar=10 μm. (D) Staining for cell debris using human MHC-1 (green) and DAPI (blue), scale bar=10 μm. (E) MPM images of human AC main stem bronchus using combined AF for elastin (red) and with SHG for collagen (green). (F) 90° (XZ) cross-sectional view of (E). MHC-1, major histocompatibility complex-1.
